# Supplementary material
Source: Springer Nature journal article supplement (https://www.springermedizin.de/resource/supplementary/13047_2010_132_MOESM6_ESM.pdf/9663214)

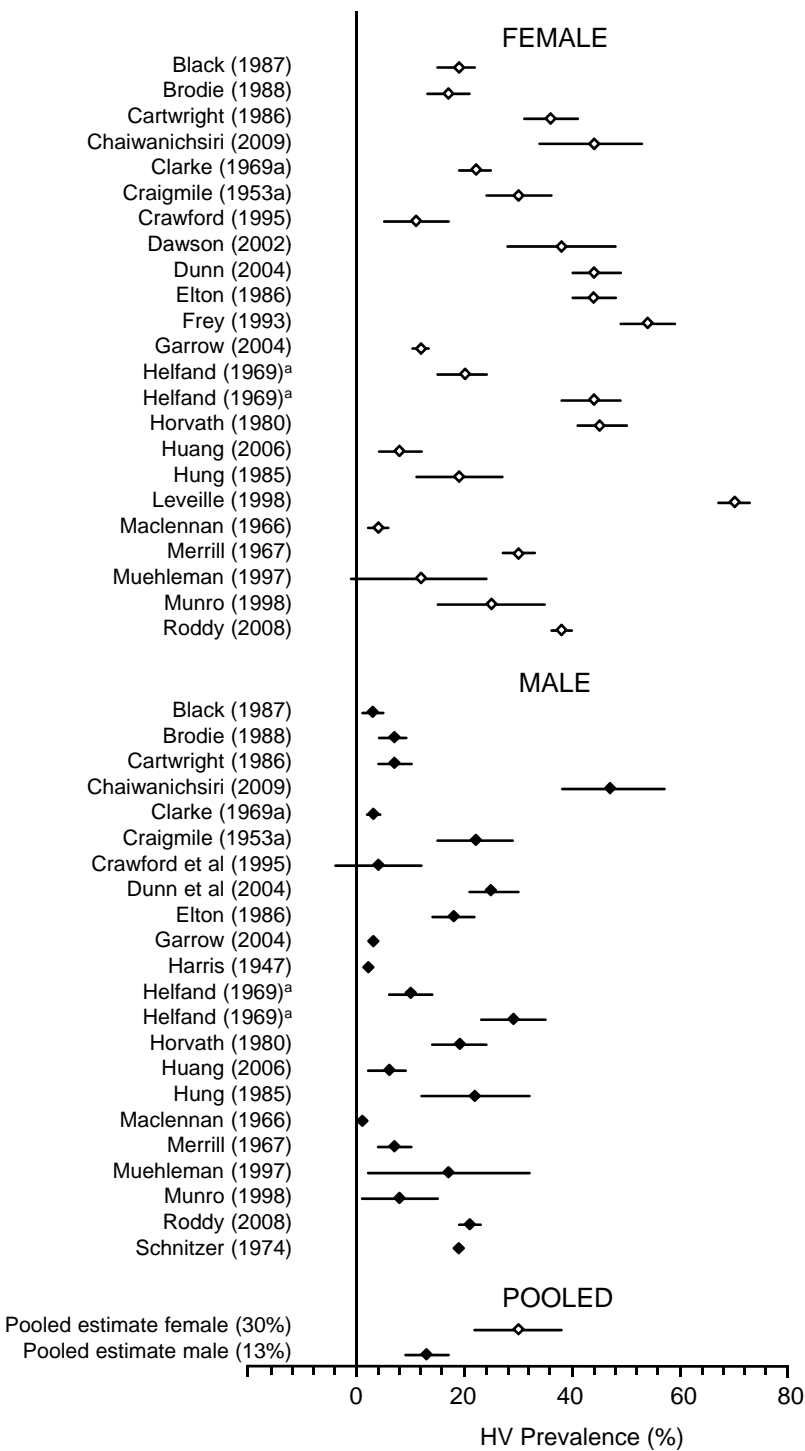

Supplement: MOESM6 [file 9663214]
